# Supplementary material for: Scientific misconduct and accountability in teams
Source: PLoS One. 2019 May 2;14(5):e0215962. doi: 10.1371/journal.pone.0215962 (PMC6497379; doi:10.1371/journal.pone.0215962)
Supplement: S1 Code — This file contains R code that reproduces the findings presented in Figs 1–3 and S1 Table. (R) [file pone.0215962.s003.R]

options(scipen=999)

###
### Preliminaries
###

library(data.table)

path = "S1_data.csv"
base = fread(path)
base = base[order(resp, index)] # reorder the data


####
#### Descriptive statistics
####


# Data for figure 1: Number of authors per article in sample
# ----------------------------------------------------------

# index: publication ID
# nauthors: number of authors in the publication
n_auth = unique(base[, .(index, nauthors)])
summary(n_auth$nauthors)
table(n_auth$nauthors)

# Data for figure 2: Author position by responsibility for misconduct
# -------------------------------------------------------------------

# Proportion of author position per responsibility
info_resp = base[, .(N = .N, first = mean(auth_first), second = mean(auth_second), 
                     middle = mean(auth_middle), senior = mean(auth_senior), corr = mean(auth_corr)), by = resp]
info_resp

# Table 2a. test of equal proportions:
test_list = list() # we store results in a list
confint_list = list()
for(var in c("auth_first", "auth_second", "auth_middle", "auth_senior", "auth_corr")){
    base$var = base[[var]] # variable to show stats for
    confint = base[, .(N=.N, N1 = sum(var), mean = mean(var), sd = sd(var) / sqrt(.N)), by = resp]
    confint[, c("CI_95_low", "CI_95_high") := .(mean-1.96*sd, mean+1.96*sd)]
    test = prop.test(confint$N1, confint$N)
    # save (we format the results):
    test_list[[var]] = data.table(variable = var, diff_in_means = -diff(test$estimate), CI_95_low = test$conf.int[1], CI_95_high = test$conf.int[2], statistic = test$statistic, df = test$parameter, pvalue = test$p.value)
    confint_list[[var]] = confint
}

# all the means and conf. intervals:
confint_list

# all the test statistics
rbindlist(test_list)

####
#### Regressions ####
####

base[, year.fe := as.factor(cyear)]

# Data for Figure 3 and Table A.1
# -------------------------------
nrow(base) # number of observations
length(unique(base[, index])) # number of publications
length(unique(base[, case])) # number of misconduct cases


probit_est = list() # we store the estimations in a list
probit_est[[1]] <- glm(resp ~ auth_first + auth_second + auth_senior, data=base, 
                       family = binomial(link = "probit"))
probit_est[[2]] <- glm(resp ~ auth_first + auth_second + auth_senior + auth_corr, data=base, 
                       family = binomial(link = "probit"))
probit_est[[3]] <- glm(resp ~ auth_first + auth_second + auth_senior + auth_corr + nauthors + year.fe, 
                       data=base, family = binomial(link = "probit"))
probit_est[[4]] <- glm(resp ~ auth_first + auth_second + auth_senior + auth_corr + nauthors + year.fe, 
                       data=base[denialcase !=1 & denialsample_exclude == 0, ], 
                       family = binomial(link = "probit"))
# Sample size in specification 4:
nrow(base[denialcase !=1 & denialsample_exclude == 0]) # number of observations
length(unique(base[denialcase !=1 & denialsample_exclude == 0, index])) # number of publications
length(unique(base[denialcase !=1 & denialsample_exclude == 0, case])) # number of misconduct cases


# Additional specification (not reported) controlling for career age and citation stock
probit_est[[5]] <- glm(resp ~ auth_first + auth_second + auth_senior + auth_corr + 
                           nauthors + careerage + careeragesq + lncitedbystock + year.fe, 
                       data=base, family = binomial(link = "probit"))

margins_at_means = function(est, vcov){
    # function that computes the marginal effects at means
    # estimation must be probit (ad hoc function, no control for misuse)
    
    coef = est$coefficients
    vars = names(coef)
    
    if(missing(vcov)){
        vcov = vcov(est)
    }
    
    m = model.matrix(est$formula, eval(est$call$data, parent.frame()))
    m_mean = colMeans(m[, vars])
    mu_mean = as.vector(m_mean %*% coef)
    
    # 1) the SE
    # 2) the ME with formatting
    
    # 1) The standard errors via the delta method (at means)
    ddnorm = function(x) 1/(sqrt(2*pi)) * -x * exp(-x**2/2)
    # jacobian from the formula
    jac = tcrossprod(coef, m_mean) * ddnorm(mu_mean)
    diag(jac) = diag(jac) + dnorm(mu_mean)
    vcov_new = jac %*% vcov %*% t(jac)
    
    sd_all = sqrt(diag(vcov_new))
    names(sd_all) = vars
    
    # 2) The marginal effect for each variable + formatting
    res = list()
    for(var in vars){
        value = coef[var] * dnorm(mu_mean)
        sd = sd_all[var]
        res[[var]] = data.table(var = var, dydx = value, se = sd, z = value/sd, pvalue = 2*pnorm(-abs(value/sd)), CI_95_low = value - 1.96*sd, CI_95_high = value + 1.96*sd)
    }
    
    rbindlist(res)
}

# Libraries for clustered SE
library(multiwayvcov)
library(lmtest) # for coeftest

#
# Loop to get both the coefficient table and the marginale effects
# Function margins_at_means() must be loaded
#

table_list = list() # results with clustered SE
marginal_list = list() # marginal effects at means
for(i in 1:5){
    est = probit_est[[i]]
    data = eval(est$call$data)
    vcov = cluster.vcov(est, cluster = data$case, df_correction = FALSE)
    table_list[[i]] = coeftest(est, vcov)
    marginal_list[[i]] = margins_at_means(est, vcov)
}

library(stargazer)
stargazer(table_list, type = "text")
 marginal_list
