# Supplementary material for: Scientific misconduct and accountability in teams
Source: PLoS One. 2019 May 2;14(5):e0215962. doi: 10.1371/journal.pone.0215962 (PMC6497379; doi:10.1371/journal.pone.0215962)
Supplement: S1 Data — This file contains reproduction data in CSV format. The data is on the publication-author level and contains the following information. CASE is an index of ORI misconduct cases. INDEX is an index of affected publications. AUTHORNUMBER is the author number of the relevant author. NAUTHORS contains the total number of authors listed on the publication. CYEAR is the publication year of the article. RESP takes value 1 if the focal author was found responsible for misconduct by the ORI, and 0 otherwise. DENIALCASE takes value 1 if the ORI findings reported that the responsible scientist denies the ORI’s conclusion and or appealed the ORI’s decision. DENIALSAMPLE_EXCLUDE takes value 1 for publication years that have too few observations to properly estimate year fixed effects once observations with DENIALCASE equal to 1 are excluded, and 0 otherwise. These publication years are eliminated from the sample in model 4 of Fig 3 and S1 Table. AUTH_FIRST, AUTH_SECOND, AUTH_SENIOR, AUTH_MIDDLE take value 1 if the author is first, second, senior, or middle author, respectively, and 0 otherwise. AUTH_CORR takes value 1 if the author is indicated to be corresponding author, and 0 otherwise. CAREERAGE contains the number of years since the author’s first publication at the article’s time of publication. CAREERAGESQ contains the same information squared. LNCITEDBYSTOCK contains the natural logarithm of the perpetual inventory stock of citation-weighted publications that the author published up to the year in which the focal article was published (depreciation rate: 15%). (CSV) [file pone.0215962.s002.csv]

case	index	authornumber	nauthors	cyear	resp	denialcase	denialsample_exclude	auth_first	auth_second	auth_senior	auth_middle	auth_corr	careerage	careeragesq	lncitedbystock
6	1	1	4	1989	1	0	0	1	0	0	0	0	1	1	6.0063534
6	1	2	4	1989	0	0	0	0	1	0	0	0	8	64	5.2073956
6	1	4	4	1989	0	0	0	0	0	1	0	0	9	81	7.2813315
6	2	1	4	1989	1	0	0	1	0	0	0	1	1	1	6.0063534
6	2	2	4	1989	0	0	0	0	1	0	0	0	1	1	4.2046928
6	2	3	4	1989	0	0	0	0	0	0	1	0	2	4	4.2046928
6	2	4	4	1989	0	0	0	0	0	1	0	0	9	81	7.2813315
6	3	1	4	1989	1	0	0	1	0	0	0	0	1	1	6.0063534
6	3	2	4	1989	0	0	0	0	1	0	0	0	1	1	5.7557421
6	3	3	4	1989	0	0	0	0	0	0	1	0	1	1	5.7557421
6	3	4	4	1989	0	0	0	0	0	1	0	0	9	81	7.2813315
6	4	1	4	1989	1	0	0	1	0	0	0	0	1	1	6.0063534
6	4	2	4	1989	0	0	0	0	1	0	0	0	2	4	4.2046928
6	4	3	4	1989	0	0	0	0	0	0	1	0	1	1	4.2046928
6	4	4	4	1989	0	0	0	0	0	1	0	1	9	81	7.2813315
11	7	1	4	1991	1	0	1	1	0	0	0	1	2	4	6.4709544
11	7	2	4	1991	0	0	1	0	1	0	0	0	1	1	3.5263605
11	7	3	4	1991	0	0	1	0	0	0	1	0	1	1	3.5263605
11	7	4	4	1991	0	0	1	0	0	1	0	0	9	81	7.5098305
13	8	1	4	1988	1	0	0	1	0	0	0	0	4	16	6.3560767
13	8	2	4	1988	0	0	0	0	1	0	0	0	9	81	5.8953867
13	8	3	4	1988	0	0	0	0	0	0	1	0	17	289	6.7773108
13	8	4	4	1988	0	0	0	0	0	1	0	0	24	576	7.0731759
13	9	1	1	1988	1	0	0	1	0	0	0	1	4	16	6.3560767
14	10	1	4	1985	1	0	1	1	0	0	0	0	4	16	4.6101604
14	10	2	4	1985	0	0	1	0	1	0	0	0	4	16	7.4995308
14	10	3	4	1985	0	0	1	0	0	0	1	0	18	324	6.5703292
14	10	4	4	1985	0	0	1	0	0	1	0	0	11	121	7.0820642
16	13	1	2	1988	0	0	0	1	0	0	0	0	1	1	3.0910425
16	13	2	2	1988	1	0	0	0	0	1	0	0	13	169	6.7290597
17	14	1	3	1990	1	0	1	1	0	0	0	0	1	1	5.811141
17	14	2	3	1990	0	0	1	0	1	0	0	0	6	36	6.9540124
17	14	3	3	1990	0	0	1	0	0	1	0	1	5	25	6.6629639
21	20	1	3	1985	1	1	1	1	0	0	0	1	12	144	6.2455096
21	20	2	3	1985	0	1	1	0	1	0	0	0	2	4	3.1591258
21	20	3	3	1985	0	1	1	0	0	1	0	0	1	1	4.2766662
21	22	1	2	1985	1	1	1	1	0	0	0	1	12	144	6.2455096
21	22	2	2	1985	0	1	1	0	0	1	0	0	1	1	4.4998097
23	25	1	4	1993	1	0	0	1	0	0	0	1	11	121	7.3652062
23	25	2	4	1993	0	0	0	0	1	0	0	0	1	1	2.5649493
23	25	3	4	1993	0	0	0	0	0	0	1	0	1	1	2.5649493
23	25	4	4	1993	0	0	0	0	0	1	0	0	10	100	3.0132399
29	26	1	14	1989	1	0	0	1	0	0	0	1	13	169	7.0646982
29	26	2	14	1989	0	0	0	0	1	0	0	0	8	64	6.6324644
29	26	3	14	1989	0	0	0	0	0	0	1	0	10	100	8.016613
29	26	4	14	1989	0	0	0	0	0	0	1	0	1	1	3.8501475
29	26	5	14	1989	0	0	0	0	0	0	1	0	6	36	4.7902474
29	26	6	14	1989	0	0	0	0	0	0	1	0	5	25	6.2123437
29	26	7	14	1989	0	0	0	0	0	0	1	0	7	49	4.8136263
29	26	8	14	1989	0	0	0	0	0	0	1	0	2	4	3.8501475
29	26	9	14	1989	0	0	0	0	0	0	1	0	1	1	3.8501475
29	26	10	14	1989	0	0	0	0	0	0	1	0	1	1	3.8501475
29	26	11	14	1989	0	0	0	0	0	0	1	0	1	1	3.8501475
29	26	12	14	1989	0	0	0	0	0	0	1	0	1	1	4.5849676
29	26	13	14	1989	0	0	0	0	0	0	1	0	5	25	7.2228799
29	26	14	14	1989	0	0	0	0	0	1	0	0	16	256	7.662725
33	28	1	9	1988	1	0	0	1	0	0	0	1	9	81	6.9802647
33	28	2	9	1988	0	0	0	0	1	0	0	0	2	4	6.1081357
33	28	3	9	1988	0	0	0	0	0	0	1	0	5	25	6.4625702
33	28	4	9	1988	0	0	0	0	0	0	1	0	10	100	6.3477054
33	28	5	9	1988	0	0	0	0	0	0	1	0	7	49	7.3379879
33	28	6	9	1988	0	0	0	0	0	0	1	0	2	4	6.129159
33	28	7	9	1988	0	0	0	0	0	0	1	0	3	9	6.6994667
33	28	8	9	1988	0	0	0	0	0	0	1	0	23	529	7.264926
33	28	9	9	1988	0	0	0	0	0	1	0	0	24	576	9.523077
33	29	1	3	1989	1	0	0	1	0	0	0	1	10	100	7.2421346
33	29	2	3	1989	0	0	0	0	1	0	0	0	8	64	7.2683086
33	29	3	3	1989	0	0	0	0	0	1	0	0	25	625	9.5072565
39	30	1	3	1991	1	0	1	1	0	0	0	1	11	121	6.0683289
39	30	2	3	1991	0	0	1	0	1	0	0	0	1	1	3.8066626
39	30	3	3	1991	0	0	1	0	0	1	0	0	28	784	7.2937236
39	31	1	6	1993	0	0	0	1	0	0	0	0	12	144	7.5456758
39	31	2	6	1993	1	0	0	0	1	0	0	0	13	169	6.3658128
39	31	3	6	1993	0	0	0	0	0	0	1	0	30	900	7.0677056
39	31	4	6	1993	0	0	0	0	0	0	1	0	9	81	6.3777294
39	31	5	6	1993	0	0	0	0	0	0	1	0	23	529	10.819039
39	31	6	6	1993	0	0	0	0	0	1	0	1	10	100	8.1403227
39	32	1	4	1992	1	0	0	1	0	0	0	1	12	144	6.0217862
39	32	2	4	1992	0	0	0	0	1	0	0	0	2	4	4.4236484
39	32	3	4	1992	0	0	0	0	0	0	1	0	14	196	7.0387979
39	32	4	4	1992	0	0	0	0	0	1	0	0	29	841	7.1400828
41	33	1	6	1995	1	0	0	1	0	0	0	0	2	4	5.4488902
41	33	2	6	1995	0	0	0	0	1	0	0	0	2	4	6.4472265
41	33	3	6	1995	0	0	0	0	0	0	1	0	6	36	5.6399713
41	33	4	6	1995	0	0	0	0	0	0	1	0	1	1	4.8040209
41	33	5	6	1995	0	0	0	0	0	0	1	0	15	225	7.9301724
41	33	6	6	1995	0	0	0	0	0	1	0	1	24	576	8.837019
47	34	1	4	1990	1	0	1	1	0	0	0	1	1	1	5.0434251
47	34	2	4	1990	0	0	1	0	1	0	0	0	3	9	6.2700663
47	34	3	4	1990	0	0	1	0	0	0	1	0	6	36	7.0811372
47	34	4	4	1990	0	0	1	0	0	1	0	0	20	400	8.6494722
50	36	1	2	1995	1	0	0	1	0	0	0	0	10	100	7.5037904
50	36	2	2	1995	0	0	0	0	0	1	0	1	4	16	4.6570067
65	37	1	2	1992	1	0	0	1	0	0	0	0	2	4	2.8791983
65	37	2	2	1992	0	0	0	0	0	1	0	1	20	400	5.7608213
66	40	1	2	1995	1	0	0	1	0	0	0	0	20	400	6.5709534
66	40	2	2	1995	0	0	0	0	0	1	0	1	14	196	9.8808947
66	43	1	8	1996	0	0	0	1	0	0	0	0	7	49	7.5292115
66	43	2	8	1996	0	0	0	0	1	0	0	0	17	289	5.530087
66	43	3	8	1996	1	0	0	0	0	0	1	0	21	441	6.5163302
66	43	4	8	1996	0	0	0	0	0	0	1	0	4	16	8.372489
66	43	5	8	1996	0	0	0	0	0	0	1	0	8	64	8.6870785
66	43	6	8	1996	0	0	0	0	0	0	1	0	2	4	5.7930136
66	43	7	8	1996	0	0	0	0	0	0	1	0	3	9	6.8400493
66	43	8	8	1996	0	0	0	0	0	1	0	1	15	225	9.8854446
66	44	1	11	1996	0	0	0	1	0	0	0	1	3	9	6.8400493
66	44	2	11	1996	0	0	0	0	1	0	0	0	7	49	7.5292115
66	44	3	11	1996	1	0	0	0	0	0	1	0	21	441	6.5163302
66	44	4	11	1996	0	0	0	0	0	0	1	0	3	9	6.3125648
66	44	5	11	1996	0	0	0	0	0	0	1	0	10	100	6.4932609
66	44	6	11	1996	0	0	0	0	0	0	1	0	34	1156	7.5387049
66	44	7	11	1996	0	0	0	0	0	0	1	0	11	121	5.7491703
66	44	8	11	1996	0	0	0	0	0	0	1	0	19	361	4.2495208
66	44	9	11	1996	0	0	0	0	0	0	1	0	20	400	6.6598701
66	44	10	11	1996	0	0	0	0	0	0	1	0	11	121	8.192749
66	44	11	11	1996	0	0	0	0	0	1	0	0	15	225	9.8854446
66	45	1	3	1996	1	0	0	1	0	0	0	1	21	441	6.5163302
66	45	2	3	1996	0	0	0	0	1	0	0	0	3	9	6.8400493
66	45	3	3	1996	0	0	0	0	0	1	0	0	15	225	9.8854446
66	46	1	4	1995	0	0	0	1	0	0	0	1	2	4	5.3849535
66	46	2	4	1995	1	0	0	0	1	0	0	0	20	400	6.5709534
66	46	3	4	1995	0	0	0	0	0	0	1	0	6	36	7.5062599
66	46	4	4	1995	0	0	0	0	0	1	0	0	14	196	9.8808947
68	48	1	1	1990	1	0	1	1	0	0	0	1	12	144	1.9285704
68	49	1	2	1994	1	0	1	1	0	0	0	1	16	256	1.9557506
68	49	2	2	1994	0	0	1	0	0	1	0	0	7	49	4.9185081
69	51	1	3	1993	1	0	0	1	0	0	0	0	6	36	6.9572325
69	51	2	3	1993	0	0	0	0	1	0	0	0	2	4	4.907125
69	51	3	3	1993	0	0	0	0	0	1	0	1	9	81	8.3229322
76	53	1	8	1994	0	1	1	1	0	0	0	0	6	36	7.8283615
76	53	2	8	1994	0	1	1	0	1	0	0	0	5	25	7.4962907
76	53	3	8	1994	0	1	1	0	0	0	1	0	24	576	4.2417684
76	53	4	8	1994	0	1	1	0	0	0	1	0	1	1	5.3327188
76	53	5	8	1994	0	1	1	0	0	0	1	0	17	289	8.3423176
76	53	6	8	1994	0	1	1	0	0	0	1	0	4	16	7.9992056
76	53	7	8	1994	0	1	1	0	0	0	1	0	19	361	9.5213757
76	53	8	8	1994	1	1	1	0	0	1	0	1	18	324	8.6172647
76	54	1	7	1994	1	1	1	1	0	0	0	1	18	324	8.6172647
76	54	2	7	1994	0	1	1	0	1	0	0	0	5	25	7.4962907
76	54	3	7	1994	0	1	1	0	0	0	1	0	6	36	7.8283615
76	54	4	7	1994	0	1	1	0	0	0	1	0	8	64	6.6730361
76	54	5	7	1994	0	1	1	0	0	0	1	0	10	100	8.2299223
76	54	6	7	1994	0	1	1	0	0	0	1	0	4	16	7.9992056
76	54	7	7	1994	0	1	1	0	0	1	0	0	19	361	9.5213757
80	55	1	5	1989	0	1	0	1	0	0	0	0	17	289	6.6850586
80	55	2	5	1989	0	1	0	0	1	0	0	0	9	81	6.1959739
80	55	3	5	1989	0	1	0	0	0	0	1	0	22	484	7.9165635
80	55	4	5	1989	0	1	0	0	0	0	1	0	5	25	6.0364957
80	55	5	5	1989	1	1	0	0	0	1	0	0	14	196	6.7700009
80	56	1	5	1989	0	1	0	1	0	0	0	1	17	289	6.6850586
80	56	2	5	1989	0	1	0	0	1	0	0	0	22	484	7.9165635
80	56	3	5	1989	0	1	0	0	0	0	1	0	9	81	6.1959739
80	56	4	5	1989	0	1	0	0	0	0	1	0	5	25	6.0364957
80	56	5	5	1989	1	1	0	0	0	1	0	0	14	196	6.7700009
80	57	1	4	1990	0	1	1	1	0	0	0	0	40	1600	6.9369025
80	57	2	4	1990	0	1	1	0	1	0	0	0	18	324	6.8653216
80	57	3	4	1990	0	1	1	0	0	0	1	0	23	529	8.0440264
80	57	4	4	1990	1	1	1	0	0	1	0	0	15	225	6.8284583
80	58	1	4	1990	0	1	1	1	0	0	0	0	6	36	5.9370365
80	58	2	4	1990	0	1	1	0	1	0	0	0	18	324	6.8653216
80	58	3	4	1990	0	1	1	0	0	0	1	0	23	529	8.0440264
80	58	4	4	1990	1	1	1	0	0	1	0	1	15	225	6.8284583
80	59	1	7	1991	0	1	1	1	0	0	0	0	2	4	4.6807413
80	59	2	7	1991	0	1	1	0	1	0	0	0	4	16	7.479311
80	59	3	7	1991	0	1	1	0	0	0	1	0	19	361	6.9873385
80	59	4	7	1991	1	1	1	0	0	0	1	0	16	256	6.9887366
80	59	5	7	1991	0	1	1	0	0	0	1	0	19	361	7.3667555
80	59	6	7	1991	0	1	1	0	0	0	1	0	41	1681	6.8311872
80	59	7	7	1991	0	1	1	0	0	1	0	1	24	576	8.1409016
83	61	1	3	1995	1	0	0	1	0	0	0	0	6	36	4.9499984
83	61	2	3	1995	0	0	0	0	1	0	0	0	23	529	6.4985728
83	61	3	3	1995	0	0	0	0	0	1	0	1	30	900	6.8131413
89	63	1	1	1992	1	0	0	1	0	0	0	1	11	121	6.3141646
90	64	1	5	1994	1	0	1	1	0	0	0	1	3	9	4.8432612
90	64	2	5	1994	0	0	1	0	1	0	0	0	9	81	6.4358859
90	64	3	5	1994	0	0	1	0	0	0	1	0	4	16	4.5642309
90	64	4	5	1994	0	0	1	0	0	0	1	0	1	1	3.6375861
90	64	5	5	1994	0	0	1	0	0	1	0	0	27	729	5.9994245
95	66	1	10	1996	0	1	0	1	0	0	0	0	6	36	5.1605406
95	66	2	10	1996	1	1	0	0	1	0	0	0	6	36	6.6670957
95	66	3	10	1996	0	1	0	0	0	0	1	0	1	1	4.5747108
95	66	4	10	1996	0	1	0	0	0	0	1	0	6	36	4.867979
95	66	5	10	1996	0	1	0	0	0	0	1	0	2	4	5.8577905
95	66	6	10	1996	0	1	0	0	0	0	1	0	8	64	6.361208
95	66	7	10	1996	0	1	0	0	0	0	1	0	10	100	6.5363555
95	66	8	10	1996	0	1	0	0	0	0	1	0	3	9	5.1474509
95	66	9	10	1996	0	1	0	0	0	0	1	0	31	961	7.8032255
95	66	10	10	1996	0	1	0	0	0	1	0	1	10	100	7.9326797
97	67	1	4	1994	1	1	1	1	0	0	0	0	1	1	2.8332133
97	67	2	4	1994	0	1	1	0	1	0	0	0	3	9	5.6240177
97	67	3	4	1994	0	1	1	0	0	0	1	0	4	16	4.7201881
97	67	4	4	1994	0	1	1	0	0	1	0	0	19	361	6.6275301
98	68	1	5	2000	0	0	0	1	0	0	0	0	7	49	5.3535666
98	68	2	5	2000	1	0	0	0	1	0	0	0	8	64	4.923018
98	68	3	5	2000	0	0	0	0	0	0	1	0	11	121	3.578522
98	68	4	5	2000	0	0	0	0	0	0	1	0	12	144	7.3144383
98	68	5	5	2000	0	0	0	0	0	1	0	1	22	484	6.7761416
99	69	1	14	1997	1	0	0	1	0	0	0	0	16	256	6.4004788
99	69	2	14	1997	0	0	0	0	1	0	0	0	3	9	5.853631
99	69	3	14	1997	0	0	0	0	0	0	1	0	18	324	7.1622453
99	69	4	14	1997	0	0	0	0	0	0	1	0	23	529	8.9114819
99	69	5	14	1997	0	0	0	0	0	0	1	0	13	169	5.3937788
99	69	6	14	1997	0	0	0	0	0	0	1	0	30	900	7.618197
99	69	7	14	1997	0	0	0	0	0	0	1	0	19	361	6.2443433
99	69	8	14	1997	0	0	0	0	0	0	1	0	4	16	6.079309
99	69	9	14	1997	0	0	0	0	0	0	1	0	10	100	7.9709411
99	69	10	14	1997	0	0	0	0	0	0	1	0	5	25	6.9704905
99	69	11	14	1997	0	0	0	0	0	0	1	0	8	64	6.0025907
99	69	12	14	1997	0	0	0	0	0	0	1	0	21	441	7.5666332
99	69	13	14	1997	0	0	0	0	0	0	1	0	19	361	9.1110096
99	69	14	14	1997	0	0	0	0	0	1	0	1	25	625	7.4796467
99	70	1	9	1996	1	0	0	1	0	0	0	0	15	225	6.5028491
99	70	2	9	1996	0	0	0	0	1	0	0	0	7	49	6.1035457
99	70	3	9	1996	0	0	0	0	0	0	1	0	1	1	3.1780539
99	70	4	9	1996	0	0	0	0	0	0	1	0	20	400	7.6510768
99	70	5	9	1996	0	0	0	0	0	0	1	0	28	784	7.1780624
99	70	6	9	1996	0	0	0	0	0	0	1	0	21	441	7.9737725
99	70	7	9	1996	0	0	0	0	0	0	1	0	22	484	8.773838
99	70	8	9	1996	0	0	0	0	0	0	1	0	18	324	9.1271229
99	70	9	9	1996	0	0	0	0	0	1	0	1	24	576	7.5970507
99	71	1	15	1997	1	0	0	1	0	0	0	0	16	256	6.4004788
99	71	2	15	1997	0	0	0	0	1	0	0	0	18	324	7.1622453
99	71	3	15	1997	0	0	0	0	0	0	1	0	3	9	5.853631
99	71	4	15	1997	0	0	0	0	0	0	1	0	1	1	2.4849067
99	71	5	15	1997	0	0	0	0	0	0	1	0	10	100	6.4260931
99	71	6	15	1997	0	0	0	0	0	0	1	0	9	81	6.3858781
99	71	7	15	1997	0	0	0	0	0	0	1	0	8	64	6.7578692
99	71	8	15	1997	0	0	0	0	0	0	1	0	4	16	6.0910554
99	71	9	15	1997	0	0	0	0	0	0	1	0	30	900	7.618197
99	71	10	15	1997	0	0	0	0	0	0	1	0	19	361	6.2443433
99	71	11	15	1997	0	0	0	0	0	0	1	0	19	361	9.0496969
99	71	12	15	1997	0	0	0	0	0	0	1	0	23	529	8.9114819
99	71	13	15	1997	0	0	0	0	0	0	1	0	23	529	7.4071007
99	71	14	15	1997	0	0	0	0	0	0	1	0	19	361	9.1110096
99	71	15	15	1997	0	0	0	0	0	1	0	1	25	625	7.4796467
99	72	1	4	1993	1	0	0	1	0	0	0	1	12	144	5.254024
99	72	2	4	1993	0	0	0	0	1	0	0	0	21	441	7.0060043
99	72	3	4	1993	0	0	0	0	0	0	1	0	15	225	8.536787
99	72	4	4	1993	0	0	0	0	0	1	0	0	3	9	5.9142323
99	73	1	14	1998	0	0	0	1	0	0	0	0	1	1	3.8066626
99	73	2	14	1998	0	0	0	0	1	0	0	0	1	1	3.8066626
99	73	3	14	1998	1	0	0	0	0	0	1	0	17	289	6.3207026
99	73	4	14	1998	0	0	0	0	0	0	1	0	2	4	4.0136766
99	73	5	14	1998	0	0	0	0	0	0	1	0	9	81	6.6539402
99	73	6	14	1998	0	0	0	0	0	0	1	0	3	9	4.1209459
99	73	7	14	1998	0	0	0	0	0	0	1	0	27	729	5.8273544
99	73	8	14	1998	0	0	0	0	0	0	1	0	31	961	7.6152029
99	73	9	14	1998	0	0	0	0	0	0	1	0	20	400	6.177897
99	73	10	14	1998	0	0	0	0	0	0	1	0	18	324	8.5170832
99	73	11	14	1998	0	0	0	0	0	0	1	0	24	576	9.1448727
99	73	12	14	1998	0	0	0	0	0	0	1	0	23	529	9.2257328
99	73	13	14	1998	0	0	0	0	0	0	1	1	20	400	9.3945284
99	73	14	14	1998	0	0	0	0	0	1	0	0	26	676	7.3846245
107	74	1	6	1996	1	0	0	1	0	0	0	0	11	121	7.5629754
107	74	2	6	1996	0	0	0	0	1	0	0	0	4	16	6.6400909
107	74	3	6	1996	0	0	0	0	0	0	1	0	1	1	6.1180973
107	74	4	6	1996	0	0	0	0	0	0	1	0	1	1	6.3818159
107	74	5	6	1996	0	0	0	0	0	0	1	0	18	324	8.4077272
107	74	6	6	1996	0	0	0	0	0	1	0	1	22	484	8.6076031
109	76	1	5	2000	1	0	0	1	0	0	0	1	10	100	5.5938034
109	76	2	5	2000	0	0	0	0	1	0	0	0	1	1	1.3862944
109	76	3	5	2000	0	0	0	0	0	0	1	0	15	225	8.3295803
109	76	4	5	2000	0	0	0	0	0	0	1	0	6	36	4.0432472
109	76	5	5	2000	0	0	0	0	0	1	0	0	1	1	1.3862944
110	77	1	3	1995	1	0	0	1	0	0	0	0	1	1	4.1431346
110	77	2	3	1995	0	0	0	0	1	0	0	0	17	289	7.5494442
110	77	3	3	1995	0	0	0	0	0	1	0	1	13	169	7.2309575
110	78	1	4	1997	0	0	0	1	0	0	0	0	19	361	7.8097649
110	78	2	4	1997	0	0	0	0	1	0	0	0	2	4	4.8850722
110	78	3	4	1997	1	0	0	0	0	0	1	0	3	9	5.3268805
110	78	4	4	1997	0	0	0	0	0	1	0	1	15	225	7.5761709
110	79	1	3	1998	1	0	0	1	0	0	0	0	4	16	5.8232698
110	79	2	3	1998	0	0	0	0	1	0	0	0	20	400	7.8659625
110	79	3	3	1998	0	0	0	0	0	1	0	1	16	256	7.6341543
114	80	1	5	2000	1	0	0	1	0	0	0	1	7	49	5.6312056
114	80	2	5	2000	0	0	0	0	1	0	0	0	11	121	6.0587182
114	80	3	5	2000	0	0	0	0	0	0	1	0	2	4	5.3655086
114	80	4	5	2000	0	0	0	0	0	0	1	0	5	25	5.9090691
114	80	5	5	2000	0	0	0	0	0	1	0	0	12	144	7.4581914
114	81	1	2	2000	1	0	0	1	0	0	0	1	7	49	5.6312056
114	81	2	2	2000	0	0	0	0	0	1	0	0	12	144	7.4581914
117	82	1	8	2000	1	0	0	1	0	0	0	0	6	36	5.6818295
117	82	2	8	2000	0	0	0	0	1	0	0	0	13	169	5.9236708
117	82	3	8	2000	0	0	0	0	0	0	1	0	8	64	6.6389532
117	82	4	8	2000	0	0	0	0	0	0	1	0	9	81	6.5432806
117	82	5	8	2000	0	0	0	0	0	0	1	0	15	225	7.2024364
117	82	6	8	2000	0	0	0	0	0	0	1	1	25	625	8.2567568
117	82	7	8	2000	0	0	0	0	0	0	1	0	32	1024	8.173418
117	82	8	8	2000	0	0	0	0	0	1	0	0	25	625	8.5673819
119	83	1	3	2001	1	0	0	1	0	0	0	1	5	25	4.9261832
119	83	2	3	2001	0	0	0	0	1	0	0	0	2	4	3.7000666
119	83	3	3	2001	0	0	0	0	0	1	0	0	21	441	8.5107946
119	84	1	5	2000	1	0	0	1	0	0	0	1	4	16	4.887269
119	84	2	5	2000	0	0	0	0	1	0	0	0	6	36	5.9798112
119	84	3	5	2000	0	0	0	0	0	0	1	0	1	1	4.6151204
119	84	4	5	2000	0	0	0	0	0	0	1	0	11	121	7.3691134
119	84	5	5	2000	0	0	0	0	0	1	0	0	20	400	8.2217827
120	85	1	2	1999	0	0	0	1	0	0	0	0	6	36	6.6126556
120	85	2	2	1999	1	0	0	0	0	1	0	1	21	441	4.5126238
121	86	1	8	2001	0	0	0	1	0	0	0	0	2	4	4.8751974
121	86	2	8	2001	0	0	0	0	1	0	0	0	1	1	3.0910425
121	86	3	8	2001	0	0	0	0	0	0	1	0	1	1	5.6312118
121	86	4	8	2001	0	0	0	0	0	0	1	0	1	1	3.0910425
121	86	5	8	2001	0	0	0	0	0	0	1	0	16	256	6.7114625
121	86	6	8	2001	0	0	0	0	0	0	1	0	6	36	7.3902144
121	86	7	8	2001	0	0	0	0	0	0	1	0	6	36	6.4517994
121	86	8	8	2001	1	0	0	0	0	1	0	1	9	81	6.806191
126	87	1	11	2000	1	0	0	1	0	0	0	0	2	4	5.7835174
126	87	2	11	2000	0	0	0	0	1	0	0	0	12	144	3.9581246
126	87	3	11	2000	0	0	0	0	0	0	1	0	13	169	6.0019584
126	87	4	11	2000	0	0	0	0	0	0	1	0	2	4	5.7908773
126	87	5	11	2000	0	0	0	0	0	0	1	0	7	49	5.8879323
126	87	6	11	2000	0	0	0	0	0	0	1	0	2	4	5.8817892
126	87	7	11	2000	0	0	0	0	0	0	1	0	5	25	6.5972848
126	87	8	11	2000	0	0	0	0	0	0	1	0	17	289	7.8626981
126	87	9	11	2000	0	0	0	0	0	0	1	0	12	144	6.414526
126	87	10	11	2000	0	0	0	0	0	0	1	0	12	144	6.3773155
126	87	11	11	2000	0	0	0	0	0	1	0	1	36	1296	7.6219969
129	88	1	2	2001	1	0	0	1	0	0	0	0	13	169	6.5343413
129	88	2	2	2001	0	0	0	0	0	1	0	1	12	144	5.9854107
131	89	1	8	2002	0	0	0	1	0	0	0	0	14	196	6.7732353
131	89	2	8	2002	0	0	0	0	1	0	0	0	6	36	5.2558045
131	89	3	8	2002	0	0	0	0	0	0	1	0	5	25	3.2391024
131	89	4	8	2002	0	0	0	0	0	0	1	0	3	9	2.9090846
131	89	5	8	2002	0	0	0	0	0	0	1	0	3	9	2.9090846
131	89	6	8	2002	1	0	0	0	0	0	1	0	17	289	6.8030171
131	89	7	8	2002	0	0	0	0	0	0	1	0	29	841	6.3093915
131	89	8	8	2002	0	0	0	0	0	1	0	1	32	1024	7.4229484
131	90	1	8	2000	1	0	0	1	0	0	0	1	15	225	7.0110645
131	90	2	8	2000	0	0	0	0	1	0	0	0	12	144	6.4382954
131	90	3	8	2000	0	0	0	0	0	0	1	0	3	9	3.5532029
131	90	4	8	2000	0	0	0	0	0	0	1	0	1	1	3.2188759
131	90	5	8	2000	0	0	0	0	0	0	1	0	1	1	3.2188759
131	90	6	8	2000	0	0	0	0	0	0	1	0	4	16	5.4020729
131	90	7	8	2000	0	0	0	0	0	0	1	0	27	729	6.3021069
131	90	8	8	2000	0	0	0	0	0	1	0	0	30	900	7.4886241
131	92	1	8	1998	0	0	0	1	0	0	0	0	5	25	5.9867759
131	92	2	8	1998	0	0	0	0	1	0	0	0	2	4	4.4790401
131	92	3	8	1998	0	0	0	0	0	0	1	0	7	49	6.6090856
131	92	4	8	1998	0	0	0	0	0	0	1	0	25	625	6.1395946
131	92	5	8	1998	0	0	0	0	0	0	1	0	24	576	5.9792628
131	92	6	8	1998	0	0	0	0	0	0	1	0	33	1089	7.4061933
131	92	7	8	1998	0	0	0	0	0	0	1	1	28	784	7.4976263
131	92	8	8	1998	1	0	0	0	0	1	0	0	13	169	6.9802938
131	93	1	8	1999	0	0	0	1	0	0	0	1	3	9	5.242157
131	93	2	8	1999	1	0	0	0	1	0	0	0	14	196	7.0699582
131	93	3	8	1999	0	0	0	0	0	0	1	0	11	121	5.8296022
131	93	4	8	1999	0	0	0	0	0	0	1	0	12	144	7.2639866
131	93	5	8	1999	0	0	0	0	0	0	1	0	8	64	6.4993114
131	93	6	8	1999	0	0	0	0	0	0	1	0	25	625	5.9481049
131	93	7	8	1999	0	0	0	0	0	0	1	0	26	676	6.2391753
131	93	8	8	1999	0	0	0	0	0	1	0	0	29	841	7.5171633
131	94	1	2	1995	1	0	0	1	0	0	0	0	10	100	6.0510645
131	94	2	2	1995	0	0	0	0	0	1	0	1	16	256	7.5241303
133	95	1	4	2000	1	0	0	1	0	0	0	0	8	64	5.4631958
133	95	2	4	2000	0	0	0	0	1	0	0	0	20	400	6.7009039
133	95	3	4	2000	0	0	0	0	0	0	1	0	13	169	7.2643118
133	95	4	4	2000	0	0	0	0	0	1	0	1	20	400	8.9617605
137	96	1	4	2001	1	0	0	1	0	0	0	0	33	1089	7.0357885
137	96	2	4	2001	0	0	0	0	1	0	0	0	3	9	5.6137028
137	96	3	4	2001	0	0	0	0	0	0	1	0	1	1	3.4339871
137	96	4	4	2001	0	0	0	0	0	1	0	1	39	1521	7.3463254
138	97	1	7	2000	1	0	0	1	0	0	0	0	8	64	4.8819995
138	97	2	7	2000	0	0	0	0	1	0	0	0	12	144	7.2139497
138	97	3	7	2000	0	0	0	0	0	0	1	0	6	36	7.2268295
138	97	4	7	2000	0	0	0	0	0	0	1	0	1	1	3.7612002
138	97	5	7	2000	0	0	0	0	0	0	1	0	1	1	3.7612002
138	97	6	7	2000	0	0	0	0	0	0	1	0	26	676	7.0879536
138	97	7	7	2000	0	0	0	0	0	1	0	1	22	484	8.5075188
138	98	1	4	2002	1	0	0	1	0	0	0	0	10	100	4.6965728
138	98	2	4	2002	0	0	0	0	1	0	0	0	1	1	2.7080503
138	98	3	4	2002	0	0	0	0	0	0	1	0	8	64	5.7584171
138	98	4	4	2002	0	0	0	0	0	1	0	1	24	576	8.332716
146	99	1	9	1993	1	0	0	1	0	0	0	1	9	81	7.7099209
146	99	2	9	1993	0	0	0	0	1	0	0	0	6	36	7.2127213
146	99	3	9	1993	0	0	0	0	0	0	1	0	6	36	6.6937308
146	99	4	9	1993	0	0	0	0	0	0	1	0	10	100	7.0358872
146	99	5	9	1993	0	0	0	0	0	0	1	0	6	36	5.7741604
146	99	6	9	1993	0	0	0	0	0	0	1	0	2	4	5.4134302
146	99	7	9	1993	0	0	0	0	0	0	1	0	2	4	5.0792279
146	99	8	9	1993	0	0	0	0	0	0	1	0	1	1	5.5606818
146	99	9	9	1993	0	0	0	0	0	1	0	0	1	1	4.7791233
146	100	1	3	1995	1	0	0	1	0	0	0	1	11	121	8.370285
146	100	2	3	1995	0	0	0	0	1	0	0	0	3	9	7.0013161
146	100	3	3	1995	0	0	0	0	0	1	0	0	8	64	7.630084
146	101	1	4	1997	1	0	0	1	0	0	0	1	13	169	8.3450909
146	101	2	4	1997	0	0	0	0	1	0	0	0	5	25	7.4173932
146	101	3	4	1997	0	0	0	0	0	0	1	0	14	196	7.7413459
146	101	4	4	1997	0	0	0	0	0	1	0	0	18	324	7.8413696
146	102	1	2	1998	0	0	0	1	0	0	0	0	4	16	7.6029902
146	102	2	2	1998	1	0	0	0	0	1	0	1	14	196	8.3619871
146	103	1	3	2000	0	0	0	1	0	0	0	1	6	36	8.0923462
146	103	2	3	2000	1	0	0	0	1	0	0	0	16	256	8.5439405
146	103	3	3	2000	0	0	0	0	0	1	0	0	19	361	9.393425
146	105	1	1	2002	1	0	0	1	0	0	0	1	18	324	8.6017284
146	106	1	2	1998	1	0	0	1	0	0	0	1	14	196	8.3619871
146	106	2	2	1998	0	0	0	0	0	1	0	0	4	16	7.6029902
146	107	1	3	1992	1	0	0	1	0	0	0	1	8	64	7.4090409
146	107	2	3	1992	0	0	0	0	1	0	0	0	5	25	6.4488497
146	107	3	3	1992	0	0	0	0	0	1	0	0	5	25	6.5193706
146	108	1	5	1985	1	0	1	1	0	0	0	1	1	1	4.2766662
146	108	2	5	1985	0	0	1	0	1	0	0	0	1	1	0
146	108	3	5	1985	0	0	1	0	0	0	1	0	1	1	0
146	108	4	5	1985	0	0	1	0	0	0	1	0	1	1	0
146	108	5	5	1985	0	0	1	0	0	1	0	0	5	25	3.4028625
154	109	1	9	1995	1	1	0	1	0	0	0	0	5	25	6.8762069
154	109	2	9	1995	0	1	0	0	1	0	0	0	10	100	6.2911344
154	109	3	9	1995	0	1	0	0	0	0	1	0	9	81	8.1365957
154	109	4	9	1995	0	1	0	0	0	0	1	0	9	81	7.7102032
154	109	5	9	1995	0	1	0	0	0	0	1	0	7	49	6.3070593
154	109	6	9	1995	0	1	0	0	0	0	1	0	12	144	8.008625
154	109	7	9	1995	0	1	0	0	0	0	1	0	1	1	4.8903489
154	109	8	9	1995	0	1	0	0	0	0	1	0	4	16	7.3610625
154	109	9	9	1995	0	1	0	0	0	1	0	1	23	529	8.9277468
154	110	1	6	1997	1	1	0	1	0	0	0	1	7	49	6.9522882
154	110	2	6	1997	0	1	0	0	1	0	0	0	4	16	7.8727112
154	110	3	6	1997	0	1	0	0	0	0	1	0	25	625	9.256937
154	110	4	6	1997	0	1	0	0	0	0	1	0	14	196	8.1345339
154	110	5	6	1997	0	1	0	0	0	0	1	0	3	9	5.7548556
154	110	6	6	1997	0	1	0	0	0	1	0	0	25	625	9.1193504
159	111	1	3	1995	1	1	0	1	0	0	0	1	15	225	6.3064189
159	111	2	3	1995	0	1	0	0	1	0	0	0	1	1	3.3322046
159	111	3	3	1995	0	1	0	0	0	1	0	0	1	1	3.3322046
159	112	1	5	1997	0	1	0	1	0	0	0	0	9	81	6.4060378
159	112	2	5	1997	0	1	0	0	1	0	0	0	5	25	5.5653491
159	112	3	5	1997	1	1	0	0	0	0	1	0	17	289	6.809
159	112	4	5	1997	0	1	0	0	0	0	1	0	27	729	6.7921667
159	112	5	5	1997	0	1	0	0	0	1	0	1	25	625	6.4984198
159	113	1	6	1999	0	1	0	1	0	0	0	0	2	4	5.8141303
159	113	2	6	1999	0	1	0	0	1	0	0	0	2	4	5.220356
159	113	3	6	1999	0	1	0	0	0	0	1	0	6	36	6.3930488
159	113	4	6	1999	1	1	0	0	0	0	1	0	19	361	7.2079983
159	113	5	6	1999	0	1	0	0	0	0	1	0	10	100	7.2443271
159	113	6	6	1999	0	1	0	0	0	1	0	1	20	400	8.7884331
161	114	1	3	2000	1	0	0	1	0	0	0	0	5	25	5.5066853
161	114	2	3	2000	0	0	0	0	1	0	0	0	1	1	3.8501475
161	114	3	3	2000	0	0	0	0	0	1	0	1	17	289	5.7910185
163	115	1	6	2001	0	0	0	1	0	0	0	0	10	100	5.7113552
163	115	2	6	2001	1	0	0	0	1	0	0	0	6	36	6.5462461
163	115	3	6	2001	0	0	0	0	0	0	1	0	5	25	5.4910922
163	115	4	6	2001	0	0	0	0	0	0	1	0	2	4	5.9752083
163	115	5	6	2001	0	0	0	0	0	0	1	0	39	1521	9.0450954
163	115	6	6	2001	0	0	0	0	0	1	0	0	22	484	8.0921535
163	116	1	2	2003	1	0	0	1	0	0	0	1	8	64	6.4466538
163	116	2	2	2003	0	0	0	0	0	1	0	0	24	576	7.8405795
163	117	1	4	2003	1	0	0	1	0	0	0	0	8	64	6.4466538
163	117	2	4	2003	0	0	0	0	1	0	0	0	2	4	4.7108808
163	117	3	4	2003	0	0	0	0	0	0	1	0	11	121	5.8404031
163	117	4	4	2003	0	0	0	0	0	1	0	1	24	576	7.8405795
168	119	1	7	2005	1	0	0	1	0	0	0	0	1	1	2.9444389
168	119	2	7	2005	0	0	0	0	1	0	0	0	1	1	2.9444389
168	119	3	7	2005	0	0	0	0	0	0	1	0	21	441	6.7817388
168	119	4	7	2005	0	0	0	0	0	0	1	0	6	36	6.231287
168	119	5	7	2005	0	0	0	0	0	0	1	0	2	4	5.3904405
168	119	6	7	2005	0	0	0	0	0	0	1	0	1	1	2.9444389
168	119	7	7	2005	0	0	0	0	0	1	0	1	29	841	7.0898719
173	120	1	6	1999	1	0	0	1	0	0	0	0	4	16	5.2991672
173	120	2	6	1999	0	0	0	0	1	0	0	0	1	1	5.3612924
173	120	3	6	1999	0	0	0	0	0	0	1	0	8	64	6.2970791
173	120	4	6	1999	0	0	0	0	0	0	1	0	8	64	5.995718
173	120	5	6	1999	0	0	0	0	0	0	1	0	31	961	8.5186529
173	120	6	6	1999	0	0	0	0	0	1	0	1	27	729	8.3227472
175	121	1	2	2005	0	0	0	1	0	0	0	1	10	100	7.9784131
175	121	2	2	2005	1	0	0	0	0	1	0	0	3	9	6.3922982
175	122	1	5	2005	0	0	0	1	0	0	0	1	10	100	7.9784131
175	122	2	5	2005	1	0	0	0	1	0	0	0	3	9	6.3922982
175	122	3	5	2005	0	0	0	0	0	0	1	0	21	441	8.4940243
175	122	4	5	2005	0	0	0	0	0	0	1	0	8	64	8.8921785
175	122	5	5	2005	0	0	0	0	0	1	0	0	35	1225	8.5081701
175	123	1	4	2005	0	0	0	1	0	0	0	1	32	1024	7.8542552
175	123	2	4	2005	1	0	0	0	1	0	0	0	3	9	6.3922982
175	123	3	4	2005	0	0	0	0	0	0	1	0	10	100	7.9784131
175	123	4	4	2005	0	0	0	0	0	1	0	0	4	16	7.0474968
179	124	1	3	2008	1	0	0	1	0	0	0	0	3	9	3.256268
179	124	2	3	2008	0	0	0	0	1	0	0	0	15	225	7.0353642
179	124	3	3	2008	0	0	0	0	0	1	0	1	27	729	5.4240451
179	126	1	3	2008	1	0	0	1	0	0	0	0	3	9	3.256268
179	126	2	3	2008	0	0	0	0	1	0	0	0	15	225	7.0353642
179	126	3	3	2008	0	0	0	0	0	1	0	0	27	729	5.4240451
184	127	1	8	2003	1	0	0	1	0	0	0	1	5	25	7.1122856
184	127	2	8	2003	0	0	0	0	1	0	0	0	5	25	8.1344852
184	127	3	8	2003	0	0	0	0	0	0	1	0	1	1	3.8918202
184	127	4	8	2003	0	0	0	0	0	0	1	0	22	484	6.4311862
184	127	5	8	2003	0	0	0	0	0	0	1	0	5	25	6.0283017
184	127	6	8	2003	0	0	0	0	0	0	1	0	17	289	9.4567556
184	127	7	8	2003	0	0	0	0	0	0	1	0	4	16	5.5312939
184	127	8	8	2003	0	0	0	0	0	1	0	0	22	484	8.3648176
186	128	1	11	2006	0	0	0	1	0	0	0	1	8	64	6.611063
186	128	2	11	2006	1	0	0	0	1	0	0	0	4	16	4.3011098
186	128	3	11	2006	0	0	0	0	0	0	1	0	10	100	5.7446303
186	128	4	11	2006	0	0	0	0	0	0	1	0	1	1	4.2195077
186	128	5	11	2006	0	0	0	0	0	0	1	0	7	49	5.20081
186	128	6	11	2006	0	0	0	0	0	0	1	0	7	49	6.2768955
186	128	7	11	2006	0	0	0	0	0	0	1	0	5	25	3.73435
186	128	8	11	2006	0	0	0	0	0	0	1	0	4	16	5.177032
186	128	9	11	2006	0	0	0	0	0	0	1	0	1	1	1.3862944
186	128	10	11	2006	0	0	0	0	0	0	1	0	38	1444	7.2673035
186	128	11	11	2006	0	0	0	0	0	1	0	0	20	400	7.6154709
188	129	1	5	2000	1	0	0	1	0	0	0	0	1	1	3.9702919
188	129	2	5	2000	0	0	0	0	1	0	0	0	1	1	4.6728287
188	129	3	5	2000	0	0	0	0	0	0	1	0	1	1	4.3307333
188	129	4	5	2000	0	0	0	0	0	0	1	0	19	361	7.7729149
188	129	5	5	2000	0	0	0	0	0	1	0	1	21	441	8.6437855
188	130	1	7	2002	1	0	0	1	0	0	0	0	1	1	3.4011974
188	130	2	7	2002	0	0	0	0	1	0	0	0	8	64	6.0887566
188	130	3	7	2002	0	0	0	0	0	0	1	0	30	900	8.3092756
188	130	4	7	2002	0	0	0	0	0	0	1	0	3	9	5.5873799
188	130	5	7	2002	0	0	0	0	0	0	1	0	3	9	5.2129636
188	130	6	7	2002	0	0	0	0	0	0	1	0	21	441	8.2768507
188	130	7	7	2002	0	0	0	0	0	1	0	1	23	529	8.554595
188	131	1	5	2000	0	0	0	1	0	0	0	0	20	400	6.6660399
188	131	2	5	2000	0	0	0	0	1	0	0	0	1	1	4.6249728
188	131	3	5	2000	1	0	0	0	0	0	1	0	1	1	4.3307333
188	131	4	5	2000	0	0	0	0	0	0	1	0	6	36	5.8924098
188	131	5	5	2000	0	0	0	0	0	1	0	1	21	441	8.6437855
189	132	1	6	1997	1	0	0	1	0	0	0	0	4	16	7.1886816
189	132	2	6	1997	0	0	0	0	1	0	0	0	4	16	6.8461165
189	132	3	6	1997	0	0	0	0	0	0	1	0	1	1	6.7007313
189	132	4	6	1997	0	0	0	0	0	0	1	0	13	169	5.7243876
189	132	5	6	1997	0	0	0	0	0	0	1	0	10	100	5.850234
189	132	6	6	1997	0	0	0	0	0	1	0	1	24	576	8.8230829
189	133	1	6	1999	1	0	0	1	0	0	0	0	6	36	7.9491882
189	133	2	6	1999	0	0	0	0	1	0	0	0	8	64	7.4015746
189	133	3	6	1999	0	0	0	0	0	0	1	0	6	36	6.4309788
189	133	4	6	1999	0	0	0	0	0	0	1	0	9	81	7.0494528
189	133	5	6	1999	0	0	0	0	0	0	1	0	26	676	8.8541298
189	133	6	6	1999	0	0	0	0	0	1	0	1	38	1444	10.128759
189	134	1	4	1999	1	0	0	1	0	0	0	0	6	36	7.9491882
189	134	2	4	1999	0	0	0	0	1	0	0	0	8	64	7.4015746
189	134	3	4	1999	0	0	0	0	0	0	1	0	26	676	8.8541298
189	134	4	4	1999	0	0	0	0	0	1	0	1	38	1444	10.128759
189	135	1	11	2003	0	0	0	1	0	0	0	0	2	4	7.2142467
189	135	2	11	2003	0	0	0	0	1	0	0	0	2	4	7.2248263
189	135	3	11	2003	0	0	0	0	0	0	1	0	8	64	7.3972101
189	135	4	11	2003	0	0	0	0	0	0	1	0	1	1	7.1024995
189	135	5	11	2003	0	0	0	0	0	0	1	0	13	169	7.3483453
189	135	6	11	2003	0	0	0	0	0	0	1	0	1	1	7.1024995
189	135	7	11	2003	0	0	0	0	0	0	1	0	1	1	7.1024995
189	135	8	11	2003	0	0	0	0	0	0	1	0	2	4	8.0907698
189	135	9	11	2003	0	0	0	0	0	0	1	0	17	289	8.7303791
189	135	10	11	2003	0	0	0	0	0	0	1	0	23	529	8.5490122
189	135	11	11	2003	1	0	0	0	0	1	0	1	10	100	8.3063717
189	136	1	18	2003	0	0	0	1	0	0	0	0	9	81	4.2873344
189	136	2	18	2003	0	0	0	0	1	0	0	0	5	25	5.8869319
189	136	3	18	2003	0	0	0	0	0	0	1	0	3	9	6.2841482
189	136	4	18	2003	0	0	0	0	0	0	1	0	1	1	4.2195077
189	136	5	18	2003	0	0	0	0	0	0	1	0	1	1	4.2195077
189	136	6	18	2003	0	0	0	0	0	0	1	0	1	1	5.3327188
189	136	7	18	2003	0	0	0	0	0	0	1	0	4	16	6.6585636
189	136	8	18	2003	0	0	0	0	0	0	1	0	1	1	4.2195077
189	136	9	18	2003	0	0	0	0	0	0	1	0	2	4	5.6427932
189	136	10	18	2003	0	0	0	0	0	0	1	0	25	625	5.9821959
189	136	11	18	2003	0	0	0	0	0	0	1	0	9	81	6.602385
189	136	12	18	2003	0	0	0	0	0	0	1	0	22	484	8.1852856
189	136	13	18	2003	0	0	0	0	0	0	1	0	11	121	6.7750044
189	136	14	18	2003	0	0	0	0	0	0	1	0	32	1024	9.9688025
189	136	15	18	2003	0	0	0	0	0	0	1	0	27	729	8.1131506
189	136	16	18	2003	0	0	0	0	0	0	1	0	29	841	7.4177232
189	136	17	18	2003	1	0	0	0	0	0	1	1	10	100	8.3063717
189	136	18	18	2003	0	0	0	0	0	1	0	0	17	289	7.2114339
189	137	1	4	2002	0	0	0	1	0	0	0	0	1	1	4.0775375
189	137	2	4	2002	0	0	0	0	1	0	0	0	1	1	4.0775375
189	137	3	4	2002	0	0	0	0	0	0	1	0	11	121	7.2834091
189	137	4	4	2002	1	0	0	0	0	1	0	1	9	81	7.9815292
190	138	1	9	2003	0	1	0	1	0	0	0	0	12	144	6.0878711
190	138	2	9	2003	0	1	0	0	1	0	0	0	12	144	5.9485569
190	138	3	9	2003	0	1	0	0	0	0	1	0	14	196	5.6895103
190	138	4	9	2003	0	1	0	0	0	0	1	0	10	100	5.9005146
190	138	5	9	2003	0	1	0	0	0	0	1	0	13	169	7.3538065
190	138	6	9	2003	1	1	0	0	0	0	1	0	18	324	7.2311149
190	138	7	9	2003	0	1	0	0	0	0	1	0	31	961	6.8958774
190	138	8	9	2003	0	1	0	0	0	0	1	0	37	1369	7.0498414
190	138	9	9	2003	0	1	0	0	0	1	0	1	32	1024	7.332139
190	139	1	9	2000	0	1	0	1	0	0	0	1	29	841	7.1724467
190	139	2	9	2000	0	1	0	0	1	0	0	0	10	100	7.211369
190	139	3	9	2000	1	1	0	0	0	0	1	0	15	225	6.9638996
190	139	4	9	2000	0	1	0	0	0	0	1	0	6	36	6.0000758
190	139	5	9	2000	0	1	0	0	0	0	1	0	7	49	5.7519526
190	139	6	9	2000	0	1	0	0	0	0	1	0	2	4	4.4290295
190	139	7	9	2000	0	1	0	0	0	0	1	0	29	841	7.4341702
190	139	8	9	2000	0	1	0	0	0	0	1	0	28	784	6.9509592
190	139	9	9	2000	0	1	0	0	0	1	0	0	34	1156	7.1279521
190	140	1	14	1999	0	1	0	1	0	0	0	1	28	784	7.1026239
190	140	2	14	1999	1	1	0	0	1	0	0	0	14	196	6.8187318
190	140	3	14	1999	0	1	0	0	0	0	1	0	8	64	5.3120551
190	140	4	14	1999	0	1	0	0	0	0	1	0	9	81	7.0728664
190	140	5	14	1999	0	1	0	0	0	0	1	0	3	9	5.6227803
190	140	6	14	1999	0	1	0	0	0	0	1	0	6	36	5.6120749
190	140	7	14	1999	0	1	0	0	0	0	1	0	5	25	5.7396393
190	140	8	14	1999	0	1	0	0	0	0	1	0	2	4	5.0714169
190	140	9	14	1999	0	1	0	0	0	0	1	0	10	100	5.7785139
190	140	10	14	1999	0	1	0	0	0	0	1	0	4	16	5.3483539
190	140	11	14	1999	0	1	0	0	0	0	1	0	28	784	7.4828491
190	140	12	14	1999	0	1	0	0	0	0	1	0	19	361	6.4843941
190	140	13	14	1999	0	1	0	0	0	0	1	0	27	729	6.9715595
190	140	14	14	1999	0	1	0	0	0	1	0	0	33	1089	6.8322353
190	141	1	8	1999	1	1	0	1	0	0	0	0	14	196	6.8187318
190	141	2	8	1999	0	1	0	0	1	0	0	0	9	81	7.0728664
190	141	3	8	1999	0	1	0	0	0	0	1	0	5	25	5.8461633
190	141	4	8	1999	0	1	0	0	0	0	1	0	8	64	5.7100654
190	141	5	8	1999	0	1	0	0	0	0	1	0	27	729	6.9715595
190	141	6	8	1999	0	1	0	0	0	0	1	0	19	361	6.4843941
190	141	7	8	1999	0	1	0	0	0	0	1	0	33	1089	6.8322353
190	141	8	8	1999	0	1	0	0	0	1	0	1	28	784	7.1026239
190	142	1	16	1998	1	1	0	1	0	0	0	0	13	169	5.9329438
190	142	2	16	1998	0	1	0	0	1	0	0	0	2	4	5.2092128
190	142	3	16	1998	0	1	0	0	0	0	1	0	8	64	6.7367215
190	142	4	16	1998	0	1	0	0	0	0	1	0	4	16	5.2488942
190	142	5	16	1998	0	1	0	0	0	0	1	0	9	81	5.2872467
190	142	6	16	1998	0	1	0	0	0	0	1	0	7	49	5.7374859
190	142	7	16	1998	0	1	0	0	0	0	1	0	18	324	6.3624029
190	142	8	16	1998	0	1	0	0	0	0	1	0	5	25	4.599998
190	142	9	16	1998	0	1	0	0	0	0	1	0	4	16	5.3201637
190	142	10	16	1998	0	1	0	0	0	0	1	0	9	81	6.9386554
190	142	11	16	1998	0	1	0	0	0	0	1	0	27	729	7.5650601
190	142	12	16	1998	0	1	0	0	0	0	1	0	1	1	4.4188404
190	142	13	16	1998	0	1	0	0	0	0	1	0	26	676	7.335681
190	142	14	16	1998	0	1	0	0	0	0	1	0	26	676	6.4386616
190	142	15	16	1998	0	1	0	0	0	0	1	0	32	1024	6.6594615
190	142	16	16	1998	0	1	0	0	0	1	0	1	27	729	6.542644
191	145	1	5	2003	0	1	0	1	0	0	0	0	14	196	5.6895103
191	145	2	5	2003	0	1	0	0	1	0	0	0	9	81	4.840868
191	145	3	5	2003	0	1	0	0	0	0	1	0	9	81	6.3638992
191	145	4	5	2003	0	1	0	0	0	0	1	0	3	9	5.392468
191	145	5	5	2003	1	1	0	0	0	1	0	1	32	1024	7.332139
191	147	1	3	2002	0	1	0	1	0	0	0	0	8	64	6.0099845
191	147	2	3	2002	0	1	0	0	1	0	0	0	11	121	5.3418431
191	147	3	3	2002	1	1	0	0	0	1	0	1	31	961	7.2890067
191	152	1	8	2005	0	1	0	1	0	0	0	0	16	256	5.4636455
191	152	2	8	2005	0	1	0	0	1	0	0	0	1	1	3.1354942
191	152	3	8	2005	0	1	0	0	0	0	1	0	8	64	5.3145761
191	152	4	8	2005	0	1	0	0	0	0	1	0	5	25	5.613286
191	152	5	8	2005	0	1	0	0	0	0	1	0	3	9	4.9988832
191	152	6	8	2005	0	1	0	0	0	0	1	0	1	1	3.1354942
191	152	7	8	2005	0	1	0	0	0	0	1	0	39	1521	6.9320436
191	152	8	8	2005	1	1	0	0	0	1	0	1	34	1156	7.0270715
191	153	1	4	2001	1	1	0	1	0	0	0	1	30	900	7.2805076
191	153	2	4	2001	0	1	0	0	1	0	0	0	8	64	6.0007563
191	153	3	4	2001	0	1	0	0	0	0	1	0	1	1	3.6109178
191	153	4	4	2001	0	1	0	0	0	1	0	0	29	841	7.0822783
191	154	1	3	2000	1	1	0	1	0	0	0	1	28	784	6.9509592
191	154	2	3	2000	0	1	0	0	1	0	0	0	1	1	2.8332133
191	154	3	3	2000	0	1	0	0	0	1	0	0	29	841	7.1724467
191	156	1	4	2002	1	1	0	1	0	0	0	1	11	121	6.1397142
191	156	2	4	2002	0	1	0	0	1	0	0	0	9	81	5.8531332
191	156	3	4	2002	0	1	0	0	0	0	1	0	30	900	6.9858513
191	156	4	4	2002	0	1	0	0	0	1	0	0	31	961	7.2890067
191	157	1	5	2001	1	1	0	1	0	0	0	1	30	900	7.2805076
191	157	2	5	2001	0	1	0	0	1	0	0	0	12	144	5.4674106
191	157	3	5	2001	0	1	0	0	0	0	1	0	18	324	5.5032129
191	157	4	5	2001	0	1	0	0	0	0	1	0	8	64	6.0007563
191	157	5	5	2001	0	1	0	0	0	1	0	0	29	841	7.0822783
191	159	1	2	2003	0	1	0	1	0	0	0	1	12	144	6.0878711
191	159	2	2	2003	1	1	0	0	0	1	0	0	32	1024	7.332139
193	160	1	3	2002	1	0	0	1	0	0	0	0	4	16	5.4543185
193	160	2	3	2002	0	0	0	0	1	0	0	0	3	9	4.4263124
193	160	3	3	2002	0	0	0	0	0	1	0	1	9	81	7.043189
193	161	1	2	2004	1	0	0	1	0	0	0	0	6	36	6.1824427
193	161	2	2	2004	0	0	0	0	0	1	0	1	11	121	7.6956964
193	162	1	2	2005	1	0	0	1	0	0	0	0	7	49	6.1978631
193	162	2	2	2005	0	0	0	0	0	1	0	1	12	144	7.9858875
195	163	1	8	2000	1	1	0	1	0	0	0	1	15	225	6.82056
195	163	2	8	2000	0	1	0	0	1	0	0	0	10	100	7.6511493
195	163	3	8	2000	0	1	0	0	0	0	1	0	5	25	6.6062422
195	163	4	8	2000	0	1	0	0	0	0	1	0	12	144	5.8969316
195	163	5	8	2000	0	1	0	0	0	0	1	0	10	100	6.8727365
195	163	6	8	2000	0	1	0	0	0	0	1	0	25	625	8.6515932
195	163	7	8	2000	0	1	0	0	0	0	1	0	21	441	8.4328022
195	163	8	8	2000	0	1	0	0	0	1	0	0	27	729	9.6581249
195	164	1	1	2000	1	1	0	1	0	0	0	1	15	225	6.82056
197	165	1	6	2008	1	0	0	1	0	0	0	0	4	16	4.4197531
197	165	2	6	2008	0	0	0	0	1	0	0	0	5	25	5.2007298
197	165	3	6	2008	0	0	0	0	0	0	1	0	3	9	4.2644038
197	165	4	6	2008	0	0	0	0	0	0	1	0	12	144	4.7412319
197	165	5	6	2008	0	0	0	0	0	0	1	0	21	441	7.4630504
197	165	6	6	2008	0	0	0	0	0	1	0	1	14	196	6.4021606
197	166	1	6	2009	0	0	0	1	0	0	0	0	6	36	4.4055829
197	166	2	6	2009	0	0	0	0	1	0	0	0	6	36	4.7129917
197	166	3	6	2009	1	0	0	0	0	0	1	0	5	25	4.3536835
197	166	4	6	2009	0	0	0	0	0	0	1	0	7	49	3.6533418
197	166	5	6	2009	0	0	0	0	0	0	1	0	4	16	4.2136688
197	166	6	6	2009	0	0	0	0	0	1	0	1	15	225	6.2534919
200	167	1	4	2006	1	0	0	1	0	0	0	0	1	1	4.7004805
200	167	2	4	2006	0	0	0	0	1	0	0	0	6	36	7.6813493
200	167	3	4	2006	0	0	0	0	0	0	1	0	1	1	4.7004805
200	167	4	4	2006	0	0	0	0	0	1	0	1	27	729	8.461483
202	168	1	6	2005	1	1	0	1	0	0	0	0	12	144	6.4016485
202	168	2	6	2005	0	1	0	0	1	0	0	0	6	36	6.0037098
202	168	3	6	2005	0	1	0	0	0	0	1	0	31	961	8.6685572
202	168	4	6	2005	0	1	0	0	0	0	1	0	21	441	8.4339113
202	168	5	6	2005	0	1	0	0	0	0	1	0	29	841	7.1673079
202	168	6	6	2005	0	1	0	0	0	1	0	1	29	841	8.4584446
202	169	1	4	2005	1	1	0	1	0	0	0	0	12	144	6.4016485
202	169	2	4	2005	0	1	0	0	1	0	0	0	4	16	5.6869302
202	169	3	4	2005	0	1	0	0	0	0	1	0	11	121	7.5510769
202	169	4	4	2005	0	1	0	0	0	1	0	1	16	256	6.3927083
204	170	1	4	2004	1	0	0	1	0	0	0	0	1	1	2.5649493
204	170	2	4	2004	0	0	0	0	1	0	0	0	8	64	5.452919
204	170	3	4	2004	0	0	0	0	0	0	1	0	36	1296	5.2288604
204	170	4	4	2004	0	0	0	0	0	1	0	1	36	1296	6.566587
205	171	1	3	2009	0	0	0	1	0	0	0	0	9	81	4.8082962
205	171	2	3	2009	0	0	0	0	1	0	0	0	36	1296	7.4143958
205	171	3	3	2009	1	0	0	0	0	1	0	1	2	4	2.5376573
205	172	1	5	2009	0	0	0	1	0	0	0	0	9	81	4.8082962
205	172	2	5	2009	0	0	0	0	1	0	0	0	18	324	4.5012746
205	172	3	5	2009	0	0	0	0	0	0	1	0	30	900	6.4953356
205	172	4	5	2009	0	0	0	0	0	0	1	0	36	1296	7.4143958
205	172	5	5	2009	1	0	0	0	0	1	0	1	19	361	6.2795887
206	173	1	3	2007	1	0	0	1	0	0	0	1	1	1	2.6390574
206	173	2	3	2007	0	0	0	0	1	0	0	0	38	1444	8.2813606
206	173	3	3	2007	0	0	0	0	0	1	0	0	31	961	6.6400747
207	174	1	7	2009	1	0	0	1	0	0	0	0	6	36	7.1880345
207	174	2	7	2009	0	0	0	0	1	0	0	0	18	324	7.518528
207	174	3	7	2009	0	0	0	0	0	0	1	0	12	144	5.0464211
207	174	4	7	2009	0	0	0	0	0	0	1	0	22	484	7.9161034
207	174	5	7	2009	0	0	0	0	0	0	1	0	18	324	7.663537
207	174	6	7	2009	0	0	0	0	0	0	1	0	31	961	8.5459728
207	174	7	7	2009	0	0	0	0	0	1	0	1	16	256	8.119524
207	175	1	4	2006	1	0	0	1	0	0	0	1	3	9	5.7151098
207	175	2	4	2006	0	0	0	0	1	0	0	0	7	49	5.7424593
207	175	3	4	2006	0	0	0	0	0	0	1	0	9	81	7.7426672
207	175	4	4	2006	0	0	0	0	0	1	0	0	38	1444	8.8223696
207	176	1	5	2008	0	0	0	1	0	0	0	0	4	16	5.5772238
207	176	2	5	2008	1	0	0	0	1	0	0	0	5	25	6.896337
207	176	3	5	2008	0	0	0	0	0	0	1	0	19	361	7.1812587
207	176	4	5	2008	0	0	0	0	0	0	1	0	7	49	5.3327241
207	176	5	5	2008	0	0	0	0	0	1	0	1	10	100	7.4409437
207	177	1	7	2005	1	0	0	1	0	0	0	1	2	4	5.0009217
207	177	2	7	2005	0	0	0	0	1	0	0	0	8	64	7.8167067
207	177	3	7	2005	0	0	0	0	0	0	1	0	6	36	5.5501299
207	177	4	7	2005	0	0	0	0	0	0	1	0	10	100	4.4792266
207	177	5	7	2005	0	0	0	0	0	0	1	0	5	25	5.9240341
207	177	6	7	2005	0	0	0	0	0	0	1	0	45	2025	7.8172469
207	177	7	7	2005	0	0	0	0	0	1	0	0	37	1369	8.7344217
207	178	1	1	2009	1	0	0	1	0	0	0	1	6	36	7.1880345
213	179	1	6	2005	1	1	0	1	0	0	0	1	36	1296	6.1053677
213	179	2	6	2005	0	1	0	0	1	0	0	0	4	16	5.4316688
213	179	3	6	2005	0	1	0	0	0	0	1	0	2	4	5.2768383
213	179	4	6	2005	0	1	0	0	0	0	1	0	4	16	5.6995234
213	179	5	6	2005	0	1	0	0	0	0	1	0	47	2209	5.7991724
213	179	6	6	2005	0	1	0	0	0	1	0	0	25	625	9.0600834
213	180	1	4	2007	1	1	0	1	0	0	0	1	38	1444	5.9866867
213	180	2	4	2007	0	1	0	0	1	0	0	0	1	1	2.8903718
213	180	3	4	2007	0	1	0	0	0	0	1	0	1	1	2.8903718
213	180	4	4	2007	0	1	0	0	0	1	0	0	27	729	8.9977961
214	181	1	4	2002	0	0	0	1	0	0	0	0	5	25	6.6958895
214	181	2	4	2002	0	0	0	0	1	0	0	0	21	441	5.5020733
214	181	3	4	2002	0	0	0	0	0	0	1	0	21	441	5.9900045
214	181	4	4	2002	1	0	0	0	0	1	0	1	12	144	7.9795318
214	182	1	10	2006	0	0	0	1	0	0	0	0	1	1	2.7080503
214	182	2	10	2006	0	0	0	0	1	0	0	0	6	36	5.9314976
214	182	3	10	2006	0	0	0	0	0	0	1	0	5	25	5.3238087
214	182	4	10	2006	0	0	0	0	0	0	1	0	25	625	5.2243686
214	182	5	10	2006	0	0	0	0	0	0	1	0	29	841	6.7732792
214	182	6	10	2006	0	0	0	0	0	0	1	0	10	100	7.5734925
214	182	7	10	2006	0	0	0	0	0	0	1	0	23	529	7.4697695
214	182	8	10	2006	0	0	0	0	0	0	1	0	5	25	5.5769477
214	182	9	10	2006	0	0	0	0	0	0	1	0	19	361	6.8371367
214	182	10	10	2006	1	0	0	0	0	1	0	1	16	256	7.7061596
214	183	1	13	2008	0	0	0	1	0	0	0	0	1	1	3.871201
214	183	2	13	2008	0	0	0	0	1	0	0	0	7	49	5.0531092
214	183	3	13	2008	0	0	0	0	0	0	1	0	19	361	6.3561296
214	183	4	13	2008	0	0	0	0	0	0	1	0	17	289	6.3725319
214	183	5	13	2008	0	0	0	0	0	0	1	0	11	121	6.7736912
214	183	6	13	2008	0	0	0	0	0	0	1	0	6	36	4.0873604
214	183	7	13	2008	0	0	0	0	0	0	1	0	13	169	5.7337985
214	183	8	13	2008	0	0	0	0	0	0	1	0	27	729	5.0772181
214	183	9	13	2008	0	0	0	0	0	0	1	0	8	64	5.6866584
214	183	10	13	2008	0	0	0	0	0	0	1	0	12	144	6.5555935
214	183	11	13	2008	0	0	0	0	0	0	1	0	6	36	4.4691019
214	183	12	13	2008	0	0	0	0	0	0	1	0	21	441	6.8268871
214	183	13	13	2008	1	0	0	0	0	1	0	1	18	324	7.5938864
214	184	1	3	2001	0	0	0	1	0	0	0	0	5	25	7.1339684
214	184	2	3	2001	0	0	0	0	1	0	0	0	1	1	3.6635616
214	184	3	3	2001	1	0	0	0	0	1	0	1	11	121	7.9843278
214	185	1	2	2000	0	0	0	1	0	0	0	0	3	9	6.5181069
214	185	2	2	2000	1	0	0	0	0	1	0	1	10	100	8.0644341
214	186	1	7	2002	0	0	0	1	0	0	0	0	1	1	3.9120231
214	186	2	7	2002	0	0	0	0	1	0	0	0	5	25	6.6958895
214	186	3	7	2002	0	0	0	0	0	0	1	0	1	1	3.9120231
214	186	4	7	2002	0	0	0	0	0	0	1	0	1	1	3.9120231
214	186	5	7	2002	0	0	0	0	0	0	1	0	13	169	8.3276176
214	186	6	7	2002	0	0	0	0	0	0	1	0	1	1	3.9120231
214	186	7	7	2002	1	0	0	0	0	1	0	1	12	144	7.9795318
214	187	1	3	2004	1	0	0	1	0	0	0	0	14	196	7.8648171
214	187	2	3	2004	0	0	0	0	1	0	0	0	1	1	4.7706847
214	187	3	3	2004	0	0	0	0	0	1	0	1	1	1	4.7706847
214	188	1	2	2005	0	0	0	1	0	0	0	0	3	9	5.5174627
214	188	2	2	2005	1	0	0	0	0	1	0	1	15	225	7.8126125
214	189	1	3	1998	0	0	0	1	0	0	0	0	1	1	5.572154
214	189	2	3	1998	0	0	0	0	1	0	0	0	13	169	8.117506
214	189	3	3	1998	1	0	0	0	0	1	0	1	8	64	7.9830198
214	190	1	2	2002	0	0	0	1	0	0	0	0	21	441	5.9900045
214	190	2	2	2002	1	0	0	0	0	1	0	1	12	144	7.9795318
217	191	1	4	2009	0	0	0	1	0	0	0	1	3	9	2.6295481
217	191	2	4	2009	0	0	0	0	1	0	0	0	1	1	2.0794415
217	191	3	4	2009	1	0	0	0	0	0	1	0	15	225	7.0227304
217	191	4	4	2009	0	0	0	0	0	1	0	0	1	1	1.0986123
217	192	1	6	2009	0	0	0	1	0	0	0	0	1	1	0
217	192	2	6	2009	0	0	0	0	1	0	0	0	1	1	0
217	192	3	6	2009	0	0	0	0	0	0	1	0	1	1	3.7376697
217	192	4	6	2009	1	0	0	0	0	0	1	0	15	225	7.0227304
217	192	5	6	2009	0	0	0	0	0	0	1	0	1	1	3.871201
217	192	6	6	2009	0	0	0	0	0	1	0	1	3	9	2.6295481
217	193	1	7	2009	0	0	0	1	0	0	0	0	3	9	2.6295481
217	193	2	7	2009	0	0	0	0	1	0	0	1	18	324	2.9720511
217	193	3	7	2009	0	0	0	0	0	0	1	0	7	49	4.8244896
217	193	4	7	2009	0	0	0	0	0	0	1	0	1	1	1.0986123
217	193	5	7	2009	0	0	0	0	0	0	1	0	25	625	6.8420143
217	193	6	7	2009	0	0	0	0	0	0	1	0	8	64	2.8433542
217	193	7	7	2009	1	0	0	0	0	1	0	0	15	225	7.0227304
220	197	1	2	2009	1	0	0	1	0	0	0	1	29	841	6.7447004
220	197	2	2	2009	0	0	0	0	0	1	0	0	14	196	5.6326308
220	198	1	2	2007	0	0	0	1	0	0	0	0	1	1	3.3322046
220	198	2	2	2007	1	0	0	0	0	1	0	1	27	729	6.9815292
221	199	1	4	2010	1	0	0	1	0	0	0	0	11	121	5.2507019
221	199	2	4	2010	0	0	0	0	1	0	0	0	3	9	5.8215876
221	199	3	4	2010	0	0	0	0	0	0	1	0	3	9	6.1258368
221	199	4	4	2010	0	0	0	0	0	1	0	1	15	225	8.7060642
221	200	1	2	2008	1	0	0	1	0	0	0	0	9	81	4.8728175
221	200	2	2	2008	0	0	0	0	0	1	0	1	13	169	8.8005333
222	201	1	3	2002	1	0	0	1	0	0	0	1	19	361	8.4553604
222	201	2	3	2002	0	0	0	0	1	0	0	0	3	9	5.0933056
222	201	3	3	2002	0	0	0	0	0	1	0	0	11	121	6.6459508
222	202	1	3	2007	1	0	0	1	0	0	0	1	24	576	8.6685829
222	202	2	3	2007	0	0	0	0	1	0	0	0	1	1	4.6151204
222	202	3	3	2007	0	0	0	0	0	1	0	0	3	9	5.7175045
222	203	1	4	2007	0	0	0	1	0	0	0	1	3	9	5.7175045
222	203	2	4	2007	0	0	0	0	1	0	0	0	1	1	4.6151204
222	203	3	4	2007	0	0	0	0	0	0	1	0	1	1	4.1431346
222	203	4	4	2007	1	0	0	0	0	1	0	0	24	576	8.6685829
224	204	1	8	2003	1	1	0	1	0	0	0	1	16	256	6.5658932
224	204	2	8	2003	0	1	0	0	1	0	0	0	1	1	3.7841897
224	204	3	8	2003	0	1	0	0	0	0	1	0	4	16	5.1099615
224	204	4	8	2003	0	1	0	0	0	0	1	0	8	64	4.5285344
224	204	5	8	2003	0	1	0	0	0	0	1	0	22	484	6.4984131
224	204	6	8	2003	0	1	0	0	0	0	1	0	18	324	8.0192223
224	204	7	8	2003	0	1	0	0	0	0	1	0	39	1521	7.5942574
224	204	8	8	2003	0	1	0	0	0	1	0	0	33	1089	8.2903614
224	205	1	6	2001	1	1	0	1	0	0	0	1	14	196	6.6192307
224	205	2	6	2001	0	1	0	0	1	0	0	0	16	256	7.901947
224	205	3	6	2001	0	1	0	0	0	0	1	0	20	400	5.1755786
224	205	4	6	2001	0	1	0	0	0	0	1	0	7	49	7.0697808
224	205	5	6	2001	0	1	0	0	0	0	1	0	28	784	7.8838577
224	205	6	6	2001	0	1	0	0	0	1	0	0	31	961	8.020771
224	219	1	9	2013	1	1	1	1	0	0	0	0	2	4	4.5427628
224	219	2	9	2013	0	1	1	0	1	0	0	0	22	484	6.6324296
224	219	3	9	2013	0	1	1	0	0	0	1	0	17	289	8.2092152
224	219	4	9	2013	0	1	1	0	0	0	1	0	2	4	4.8040209
224	219	5	9	2013	0	1	1	0	0	0	1	0	10	100	6.4401703
224	219	6	9	2013	0	1	1	0	0	0	1	0	24	576	7.7949834
224	219	7	9	2013	0	1	1	0	0	0	1	0	19	361	7.682013
224	219	8	9	2013	0	1	1	0	0	0	1	0	30	900	8.1171284
224	219	9	9	2013	0	1	1	0	0	1	0	1	38	1444	9.1637402
225	206	1	4	2009	1	0	0	1	0	0	0	0	2	4	4.5266681
225	206	2	4	2009	0	0	0	0	1	0	0	0	5	25	5.2606025
225	206	3	4	2009	0	0	0	0	0	0	1	0	1	1	3.2958369
225	206	4	4	2009	0	0	0	0	0	1	0	1	14	196	6.2756233
226	207	1	6	2006	1	0	0	1	0	0	0	1	25	625	7.0572314
226	207	2	6	2006	0	0	0	0	1	0	0	0	27	729	6.9566774
226	207	3	6	2006	0	0	0	0	0	0	1	0	7	49	5.7014542
226	207	4	6	2006	0	0	0	0	0	0	1	0	1	1	4.3694477
226	207	5	6	2006	0	0	0	0	0	0	1	0	18	324	6.7713923
226	207	6	6	2006	0	0	0	0	0	1	0	0	1	1	4.3694477
226	208	1	2	2007	1	0	0	1	0	0	0	1	26	676	7.0459437
226	208	2	2	2007	0	0	0	0	0	1	0	0	28	784	6.9601274
227	220	1	5	2001	1	0	0	1	0	0	0	0	1	1	5.267858
227	220	2	5	2001	0	0	0	0	1	0	0	0	7	49	5.7089567
227	220	3	5	2001	0	0	0	0	0	0	1	0	11	121	7.0250216
227	220	4	5	2001	0	0	0	0	0	0	1	0	16	256	7.724412
227	220	5	5	2001	0	0	0	0	0	1	0	1	19	361	8.3575706
227	221	1	3	2005	1	0	0	1	0	0	0	0	5	25	5.9289165
227	221	2	3	2005	0	0	0	0	1	0	0	0	20	400	6.7423038
227	221	3	3	2005	0	0	0	0	0	1	0	1	23	529	8.0461845
228	209	1	11	2010	0	0	0	1	0	0	0	0	28	784	6.2325268
228	209	2	11	2010	0	0	0	0	1	0	0	0	25	625	8.7604332
228	209	3	11	2010	0	0	0	0	0	0	1	0	22	484	7.6965566
228	209	4	11	2010	0	0	0	0	0	0	1	0	4	16	6.1248074
228	209	5	11	2010	0	0	0	0	0	0	1	0	1	1	4.9767337
228	209	6	11	2010	0	0	0	0	0	0	1	0	8	64	5.4665575
228	209	7	11	2010	0	0	0	0	0	0	1	0	4	16	4.8767276
228	209	8	11	2010	0	0	0	0	0	0	1	0	19	361	8.3778524
228	209	9	11	2010	0	0	0	0	0	0	1	0	9	81	7.8839064
228	209	10	11	2010	1	0	0	0	0	0	1	1	26	676	7.5985622
228	209	11	11	2010	0	0	0	0	0	1	0	0	19	361	6.7391167
228	210	1	12	2008	0	0	0	1	0	0	0	0	26	676	6.056314
228	210	2	12	2008	0	0	0	0	1	0	0	0	23	529	8.4918222
228	210	3	12	2008	0	0	0	0	0	0	1	0	17	289	6.6848483
228	210	4	12	2008	0	0	0	0	0	0	1	0	2	4	5.871695
228	210	5	12	2008	0	0	0	0	0	0	1	0	6	36	5.0091724
228	210	6	12	2008	0	0	0	0	0	0	1	0	5	25	7.8779383
228	210	7	12	2008	0	0	0	0	0	0	1	0	25	625	10.24131
228	210	8	12	2008	0	0	0	0	0	0	1	0	20	400	7.7634678
228	210	9	12	2008	0	0	0	0	0	0	1	0	30	900	7.0489101
228	210	10	12	2008	0	0	0	0	0	0	1	0	17	289	8.3967972
228	210	11	12	2008	0	0	0	0	0	0	1	1	7	49	6.8443971
228	210	12	12	2008	1	0	0	0	0	1	0	0	24	576	7.6031194
228	211	1	9	2007	0	0	0	1	0	0	0	0	16	256	6.2894735
228	211	2	9	2007	0	0	0	0	1	0	0	0	2	4	6.0985236
228	211	3	9	2007	0	0	0	0	0	0	1	0	4	16	7.6057596
228	211	4	9	2007	0	0	0	0	0	0	1	0	1	1	5.6419072
228	211	5	9	2007	0	0	0	0	0	0	1	0	22	484	8.0990324
228	211	6	9	2007	0	0	0	0	0	0	1	0	18	324	6.3144455
228	211	7	9	2007	0	0	0	0	0	0	1	0	6	36	6.5124569
228	211	8	9	2007	1	0	0	0	0	0	1	1	23	529	7.3554993
228	211	9	9	2007	0	0	0	0	0	1	0	0	24	576	10.009154
228	212	1	5	2006	0	0	0	1	0	0	0	0	15	225	5.7143908
228	212	2	5	2006	0	0	0	0	1	0	0	0	1	1	5.2626901
228	212	3	5	2006	0	0	0	0	0	0	1	0	13	169	5.873826
228	212	4	5	2006	0	0	0	0	0	0	1	0	27	729	6.1599264
228	212	5	5	2006	1	0	0	0	0	1	0	1	22	484	7.1110592
228	213	1	3	2004	0	0	0	1	0	0	0	0	2	4	3.0130808
228	213	2	3	2004	0	0	0	0	1	0	0	0	13	169	5.033865
228	213	3	3	2004	1	0	0	0	0	1	0	1	20	400	7.2211933
228	222	1	12	2013	1	0	1	1	0	0	0	0	10	100	4.6754537
228	222	2	12	2013	0	0	1	0	1	0	0	0	10	100	5.259285
228	222	3	12	2013	0	0	1	0	0	0	1	0	1	1	3.2580965
228	222	4	12	2013	0	0	1	0	0	0	1	0	4	16	4.1209741
228	222	5	12	2013	0	0	1	0	0	0	1	0	2	4	4.3241324
228	222	6	12	2013	0	0	1	0	0	0	1	0	1	1	3.2580965
228	222	7	12	2013	0	0	1	0	0	0	1	0	21	441	5.7531962
228	222	8	12	2013	0	0	1	0	0	0	1	0	35	1225	6.7612128
228	222	9	12	2013	0	0	1	0	0	0	1	0	21	441	9.0149021
228	222	10	12	2013	0	0	1	0	0	0	1	0	18	324	6.3312449
228	222	11	12	2013	0	0	1	0	0	0	1	0	42	1764	8.5519772
228	222	12	12	2013	0	0	1	0	0	1	0	1	50	2500	7.9899836
229	223	1	5	2010	0	0	0	1	0	0	0	1	10	100	7.1589141
229	223	2	5	2010	1	0	0	0	1	0	0	0	1	1	0
229	223	3	5	2010	0	0	0	0	0	0	1	0	1	1	0
229	223	4	5	2010	0	0	0	0	0	0	1	0	2	4	5.9459438
229	223	5	5	2010	0	0	0	0	0	1	0	0	10	100	8.1573305
230	216	1	2	2010	1	0	0	1	0	0	0	1	1	1	5.1474943
230	216	2	2	2010	0	0	0	0	0	1	0	0	17	289	8.6055622
231	224	1	2	2005	1	1	0	1	0	0	0	0	1	1	3.9120231
231	224	2	2	2005	0	1	0	0	0	1	0	1	11	121	7.412848
231	225	1	3	2007	1	1	0	1	0	0	0	0	3	9	4.399406
231	225	2	3	2007	0	1	0	0	1	0	0	0	30	900	8.2077904
231	225	3	3	2007	0	1	0	0	0	1	0	1	13	169	7.2465897
231	226	1	2	2007	1	1	0	1	0	0	0	0	3	9	4.399406
231	226	2	2	2007	0	1	0	0	0	1	0	1	13	169	7.2465897
231	227	1	2	2008	1	1	0	1	0	0	0	0	4	16	4.7650938
231	227	2	2	2008	0	1	0	0	0	1	0	1	14	196	7.1723971
233	217	1	3	2008	1	0	0	1	0	0	0	0	2	4	4.5798526
233	217	2	3	2008	0	0	0	0	1	0	0	0	29	841	5.7792563
233	217	3	3	2008	0	0	0	0	0	1	0	1	36	1296	8.0837173
233	218	1	6	2009	1	0	0	1	0	0	0	0	3	9	4.8443837
233	218	2	6	2009	0	0	0	0	1	0	0	1	30	900	5.6529832
233	218	3	6	2009	0	0	0	0	0	0	1	0	9	81	6.3734398
233	218	4	6	2009	0	0	0	0	0	0	1	0	5	25	4.9145107
233	218	5	6	2009	0	0	0	0	0	0	1	0	30	900	6.7847099
233	218	6	6	2009	0	0	0	0	0	1	0	0	37	1369	7.9725418
